# Supplementary material for: Opinion paper on the diagnosis and treatment of progressive familial intrahepatic cholestasis
Source: PubMed Central journal article supplement — JHEP Rep. 2023 Oct 27;6(1):100949. doi: 10.1016/j.jhepr.2023.100949 (PMC10772241; doi:10.1016/j.jhepr.2023.100949), 2023-10-27
Supplement: mmc1.pdf [file mmc1.pdf]

**Opinion paper on the diagnosis and treatment of progressive familial  
intrahepatic cholestasis**

Patrick McKiernan, Jesus Quintero Bernabeu, Muriel Girard, Giuseppe Indolfi,  
Eberhard Lurz, Palak Trivedi

Table of contents

Table S1.....2

| Search #no | Topic                             | Search Terms                                                                                                                                                                                                                                                                                                                                                                                                                                     |
|------------|-----------------------------------|--------------------------------------------------------------------------------------------------------------------------------------------------------------------------------------------------------------------------------------------------------------------------------------------------------------------------------------------------------------------------------------------------------------------------------------------------|
| 1          | Disease                           | "PFIC" OR<br>"Progressive familial intrahepatic cholestasis" OR<br>"Byler's disease" OR<br>"Byler"                                                                                                                                                                                                                                                                                                                                               |
| 2          | Genetic testing                   | "Genetic testing" OR<br>"Genetic test" OR<br>"Testing" OR<br>"Test" OR<br>"Screening" OR<br>"Screen" OR<br>"Genetic" OR<br>"Gene" OR<br>"Genes" OR<br>"FIC1" OR<br>"PFIC1" OR<br>"BSEP" OR<br>"PFIC2" OR<br>"MDR3" OR<br>"PFIC3" OR<br>"TJP2" OR<br>"PFIC4" OR<br>"FXR" OR<br>"PFIC5" OR<br>"MYO5B" OR<br>"PFIC6" OR<br>"ATP8B1" OR<br>"ABCB11" OR<br>"ABCB4" OR<br>"TJP2" OR<br>"NR1H4" OR<br>"USP53" OR<br>"PFIC7" OR<br>"KIF12" OR<br>"PFIC8" |
| 3          | Biomarkers of disease progression | "Serum bile acids" OR<br>"Bile acids" OR<br>"Bile" OR<br>"Bilirubin" OR<br>"Conjugated bilirubin" OR<br>"Biomarker" OR<br>"Biomarkers" OR<br>"Serum biomarker" OR<br>"Diagnosis" OR<br>"Disease progression" OR<br>"Disease progress" OR<br>"Progression" OR<br>"Predict" OR<br>"Prediction" OR<br>"Predictive" OR<br>"Indicate" OR<br>"Indicator"                                                                                               |
| 4          | Treatment landscape               | "Treatment" OR<br>"Treat" OR<br>"Treating" OR<br>"IBAT inhibitor" OR<br>"Ileal bile acid transport inhibitor" OR<br>"Ileal bile acid transport inhibitors" OR<br>"Therapeutic" OR<br>"Medication" OR<br>"guidelines" OR<br>"guide" OR<br>"Recommend" OR<br>"Recommended" OR<br>"Consensus" OR<br>"Position" OR<br>"Case series" OR<br>"Case" OR<br>"Case reports"                                                                                |
| 5          | Genetic testing in PFIC           | 1 AND 2                                                                                                                                                                                                                                                                                                                                                                                                                                          |
| 6          | Biomarkers of disease progression | 1 AND 3                                                                                                                                                                                                                                                                                                                                                                                                                                          |
| 7          | PFIC pathway                      | 1 AND 4                                                                                                                                                                                                                                                                                                                                                                                                                                          |
| 8          | Date of literature search         | 03/01/2023                                                                                                                                                                                                                                                                                                                                                                                                                                       |

**Table S1. Literature search terms and literature search strategy**
